# Supplementary material
Source: Research Square preprint supplement (doi:10.21203/rs.3.rs-9219581/v1)
Supplement: Supplementary file 1 [file 70b5d04fb2b6b7f5c9e94222.docx]

Table 1: Social Demographic Characteristics of the respondents.

| Variable | Frequencies (N = 366) | Percentage % (100) |
| --- | --- | --- |
| Residence |  |  |
| Lira City | 253 | 69.1 |
| Other | 113 | 30.9 |
|  |  |  |
| Age |  |  |
| 20-29 | 170 | 46.4 |
| 30-39 | 140 | 38.3 |
| 40-49 | 39 | 10.7 |
| 50 above | 17 | 4.6 |
|  |  |  |
| Sex |  |  |

| Male | 357 | 97.5 |
| --- | --- | --- |
| Female | 9 | 2.5 |
|  |  |  |
| Education Level |  |  |
| No formal education | 86 | 23.5 |
| Primary | 108 | 29.5 |
| Secondary | 106 | 29.0 |
| Tertiary | 66 | 18.0 |
|  |  |  |
| Marital status |  |  |
| Single | 95 | 26.0 |
| Married | 104 | 28.4 |
| Cohabiting | 99 | 27.0 |
| Divorced | 68 | 18.6 |
|  |  |  |
| Religion |  |  |
| Protestant | 81 | 22.1 |
| Catholic | 94 | 25.7 |
| Born again | 74 | 20.2 |
| Muslim | 65 | 17.8 |
| Other | 52 | 14.2 |
|  |  |  |
| Experience in Boda-boda Business. |  |  |
| Less than 1 Year | 89 | 24.3 |
| 1-5 years | 146 | 39.9 |
| Above 5 years | 131 | 35.8 |
|  |  |  |
